# Supplementary material
Source: publisher site journal article supplement (https://static.cambridge.org/content/id/urn:cambridge.org:id:article:S0899823X20002743/resource/name/S0899823X20002743supp001.docx)
Supplement: Supplementary file 1 [file S0899823X20002743supp001.docx]

**Table S1.** Comparison of CRBSI definitions according to the 2008 and 2012 AGIHO criteria

| **Diagnosis** | **2008 AGIHO definition1** | **2012 AGIHO definition2** |
| --- | --- | --- |
| ***Definite* CRBSI** |  | |
| I | Growth of same pathogen from blood culture of peripheral vein and from culture of CVC tip  *plus* susceptibility testing results in same resistance pattern | |
| II | Growth of same pathogen from blood culture of CVC and from blood culture of peripheral vein | |
| IIa | *plus* DTTP ≥2 h | |
| IIb | *or*, for quantitative culture, ≥10-fold greater CFU of patho-gens grown from blood culture of CVC than CFU from peri-pheral vein | *or*, for quantitative culture, ≥3-fold greater colony count of pathogens grown from blood culture of CVC than colony count from peripheral vein |
| ***Probable* CRBSI** |  |  |
| I | (n/a) | Growth of same pathogen from blood culture of CVC and from blood culture of peripheral vein *plus* no criteria for definite CRBSI *plus* detection of coagulase-negative staphylococci, *S. aureus* or *Candida* spp. *plus* no other focus |
| II | Local infection *plus* positive blood culture | |
| IIa | (n/a) | *plus* no criteria for definite CRBSI |
| III | Fever remission <48 h after CVC removal *plus* positive blood culture | (n/a; moved to possible CRBSI, and restricted) |
| IV | CVC tip colonization (>15 CFU in semiquantitative culture) | (n/a; moved to possible CRBSI, and extended) |
| ***Possible* CRBSI** |  |  |
| I | Pathogen detected in blood culture typically causing CVC infection (*S. epidermidis*, *S. aureus*, *Candida* spp.) | |
| Ia | (n/a) | *plus* no other focus |
| II | Positive blood culture *plus* no other focus | (n/a) |
| III | (n/a) | Fever remission <48 h after CVC removal *plus* no other focus |
| IV | (n/a) | CVC tip colonization (>15 CFU in semiquantitative/>100 CFU in quantitative culture) *plus* infection signs *plus* no BSI |

**Note.**CRBSI, central venous catheter-related bloodstream infection; AGIHO, Infectious Diseases Working Party of the German Society of Hematology and Medical Oncology; CVC, central venous catheter; CFU, colony forming unit; DTTP, differential time to positivity of CVC blood culture and peripheral blood culture; BSI, bloodstream infection; n/a, not applicable.

1. Wolf HH, Leithauser M, Maschmeyer G, et al. Central venous catheter-related infections in hematology and oncology: guidelines of the Infectious Diseases Working Party (AGIHO) of the German Society of Hematology and Oncology (DGHO). *Ann Hematol* 2008;87:863-876.

2. Hentrich M, Schalk E, Schmidt-Hieber M, et al. Central venous catheter-related infections in hematology and oncology: 2012 updated guidelines on diagnosis, management and prevention by the Infectious Diseases Working Party of the German Society of Hematology and Medical Oncology. *Ann Oncol* 2014;25:936-947.
